# Supplementary material for: A Simple Protocol for the Determination of Lysostaphin Enzymatic Activity
Source: MDPI journal article supplement (doi:10.3390/antibiotics9120917), 2020-12-17
Supplement: s1 [file s1]

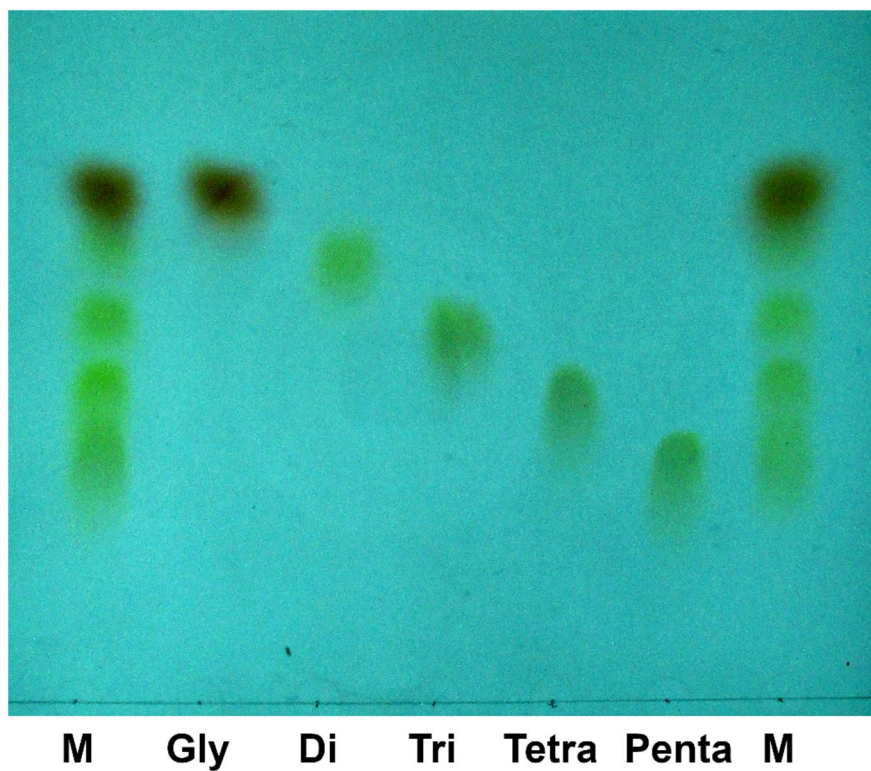

**Figure S1.** Separation of oligoglycine peptides of different length with thin layer chromatography. M – mixture of five oligoglycines; Gly – glycine; Di – diglycine; Tri – triglycine; Tetra – tetraglycine; Penta – pentaglycine.

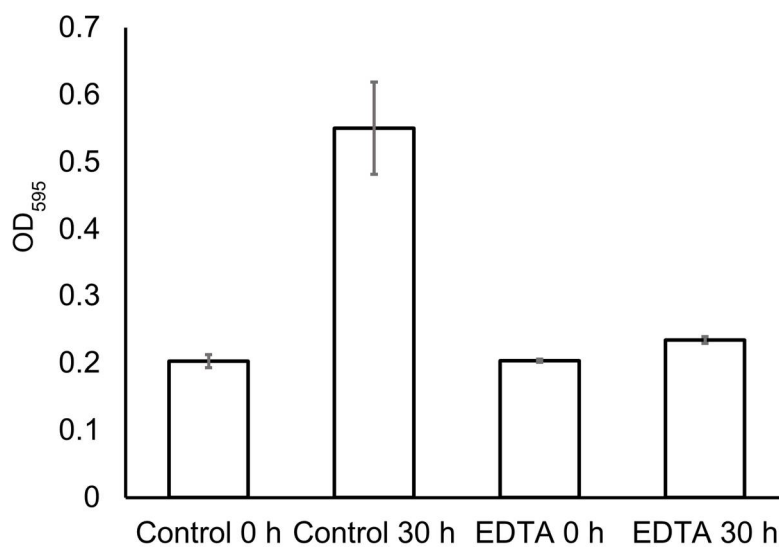

**Figure S2.** Comparison of the catalytic activity of control and EDTA-treated lysostaphin variants. 4 mM pentaglycine in 20 mM HEPES, pH 7.5, was mixed with either 3  $\mu$ M lysostaphin (control), or 3  $\mu$ M lysostaphin treated with 5 mM EDTA for 3 h, incubated at 37°C for 30 h, and reacted with ninhydrin; the average results from 3 independent experiments are shown, error bars represent standard deviation.

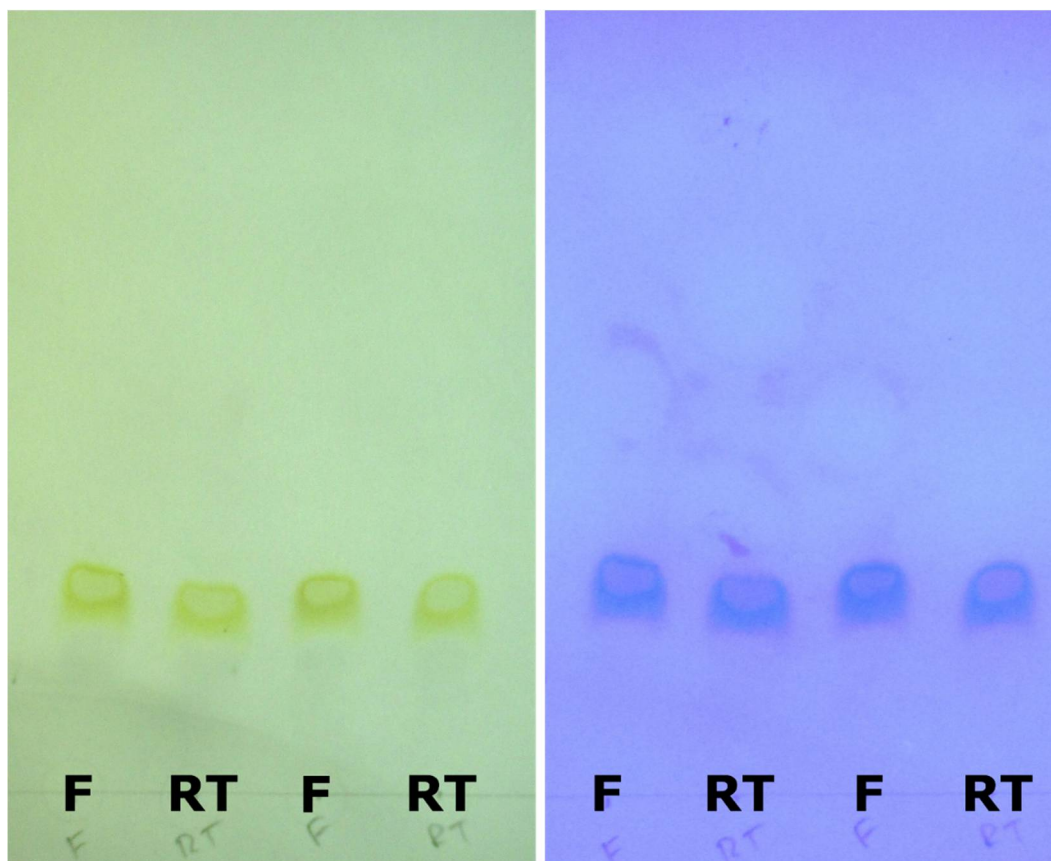

**Figure S3.** Pentaglycine does not spontaneously hydrolyze upon repeated freezing and heating. Pentaglycine was dissolved in milliQ water in the concentration of 5 mM by heating at 99°C for 20 min. The solution was divided into two parts. The first part was frozen at -80°C, thawed by heating at 99°C for 20 min, diluted to 4 mM, buffered with 20 mM HEPES, pH 7.5, aliquoted into 20  $\mu$ L aliquots, frozen at -80°C, and thawed by heating at 99°C for 10 min, thus simulating the freeze/heat cycles pentaglycine undergoes during the protocol (F – “full protocol” variant). The second part was diluted to 4 mM, buffered with 20 mM HEPES, pH 7.5, aliquoted into 20  $\mu$ L aliquots, and kept at room temperature (RT – “room temperature” variant). Both parts were applied to a TLC plate and developed in 2:5:1 butanol: acetic acid: water mixture. The plate was stained with ninhydrin and visualized under white light (left) or UV (right). No traces of spontaneous hydrolysis are seen in either pentaglycine variant.
